# Supplementary material for: Synthesis, characterization, and visible-light photocatalytic activity of BiOI hierarchical flower-like microspheres
Source: Royal Society of Chemistry journal article supplement (doi:10.1039/c4ra04829f), 2014-01-01
Supplement: c4ra04829f1.pdf [file c4ra04829f1.pdf]

# Supporting Information

## Synthesis, characterization, and visible-light photocatalytic activity of BiOI hierarchical flower-like microspheres

Jingyi Liu <sup>a</sup>, Haiping Li <sup>b</sup>, Na Du <sup>c</sup>, Shue Song <sup>c</sup>, Wanguo Hou <sup>c\*</sup>

<sup>a</sup> *Environment Research Institute, Shandong University, Jinan 250100, P.R. China;*

<sup>b</sup> *National Engineering Technology Research Center for Colloidal Materials, Shandong University, Jinan 250100, P.R. China;*

<sup>c</sup> *Key Laboratory of Colloid and Interface Chemistry (Ministry of Education), Shandong University, Jinan 250100, P.R. China*

### S1. Preparation of BiOI nanoplates

In a typical procedure, a 20 ml aqueous solution containing 0.04 g KI was added dropwise to 0.1 g Bi(NO<sub>3</sub>)<sub>3</sub>·5H<sub>2</sub>O dissolved in 20 ml ethanol. The mixture was stirred intensively for 20 min and then transferred into a 60 ml Teflon-lined autoclave. The autoclave was heated at 160 °C for 30 h. And then the final product was collected by filtration, washed with deionized water for several times and dried at 60 °C. The BiOI nanoplate is designated as BiOI-p.

### S2. Preparation of N doped TiO<sub>2</sub> photocatalysts

N doped TiO<sub>2</sub> photocatalyst was prepared by means of solid-state reaction

method using urea as a nitrogen source [1]. P25 TiO<sub>2</sub> (1.0 g) was finely milled with urea (2.0 g) and the mixture was heated at 400 °C for 2 h. After cooling to the room temperature, the N doped TiO<sub>2</sub> photocatalyst was obtained.

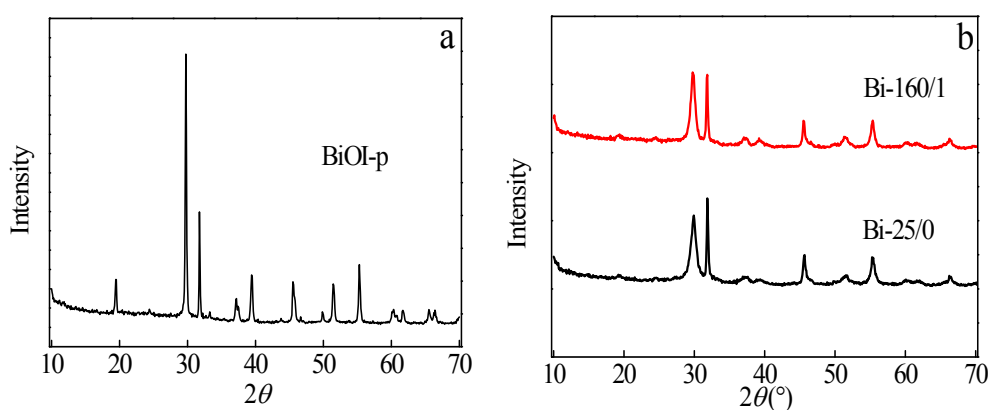

Fig. S1 XRD patterns of (a) as-synthesized BiOI nanoplate and (b) BiOI samples.

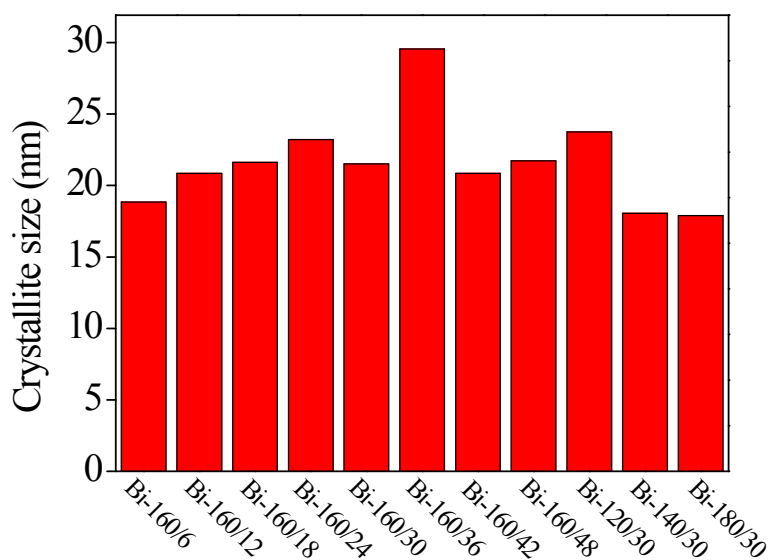

Fig. S2 Average crystallite sizes of the BiOI samples calculated from the (012) peaks of the XRD patterns using the Scherrer formula

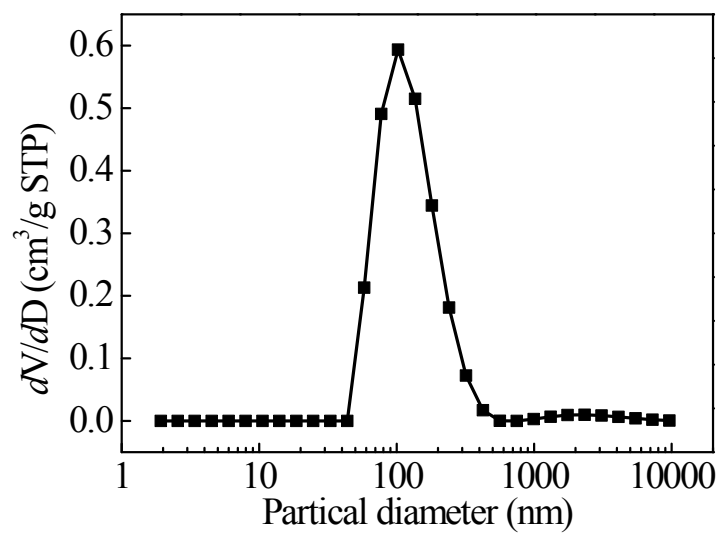

Fig. S3 Size distribution of the tetrabutylammonium iodide solution (0.0038 g/L) measured by DLS.

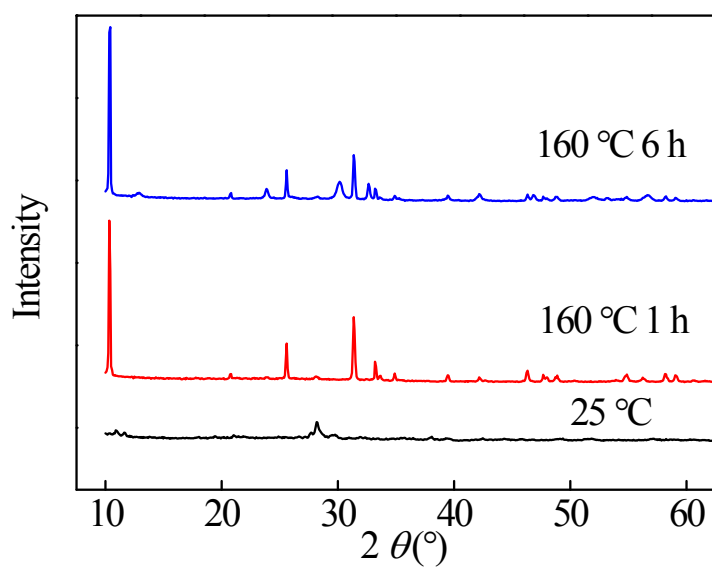

Fig. S4 XRD patterns of the as-synthesized  $\text{BiONO}_3$ .

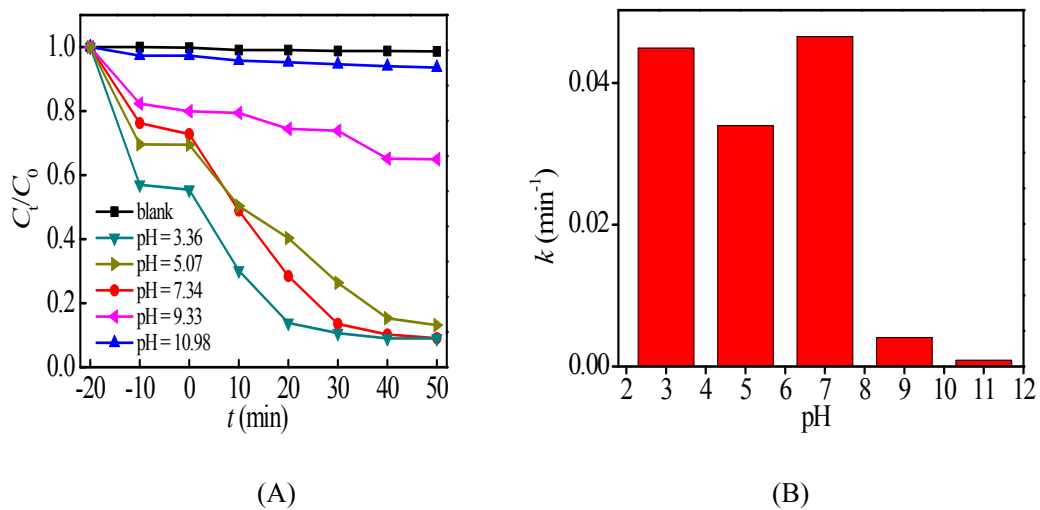

Fig. S5 (A) Photodegradation and (B) apparent first-order rate constants of RhB on Bi-160/30 at different pH.

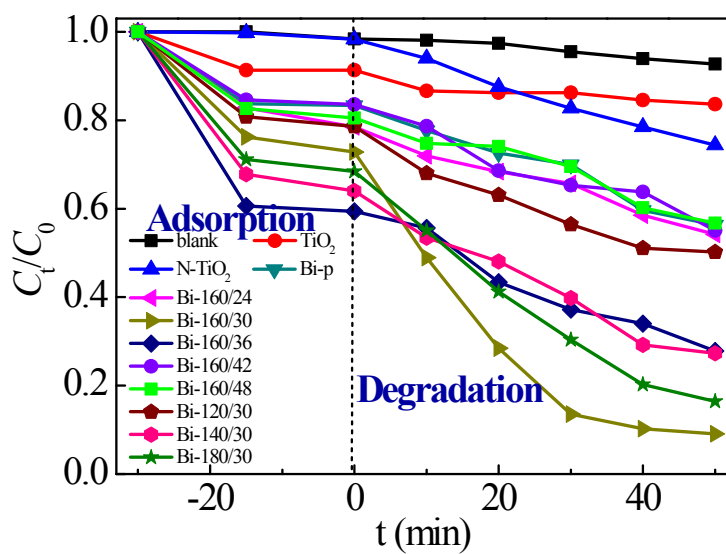

Fig. S6 Photodegradation of RhB over different BiOI samples.

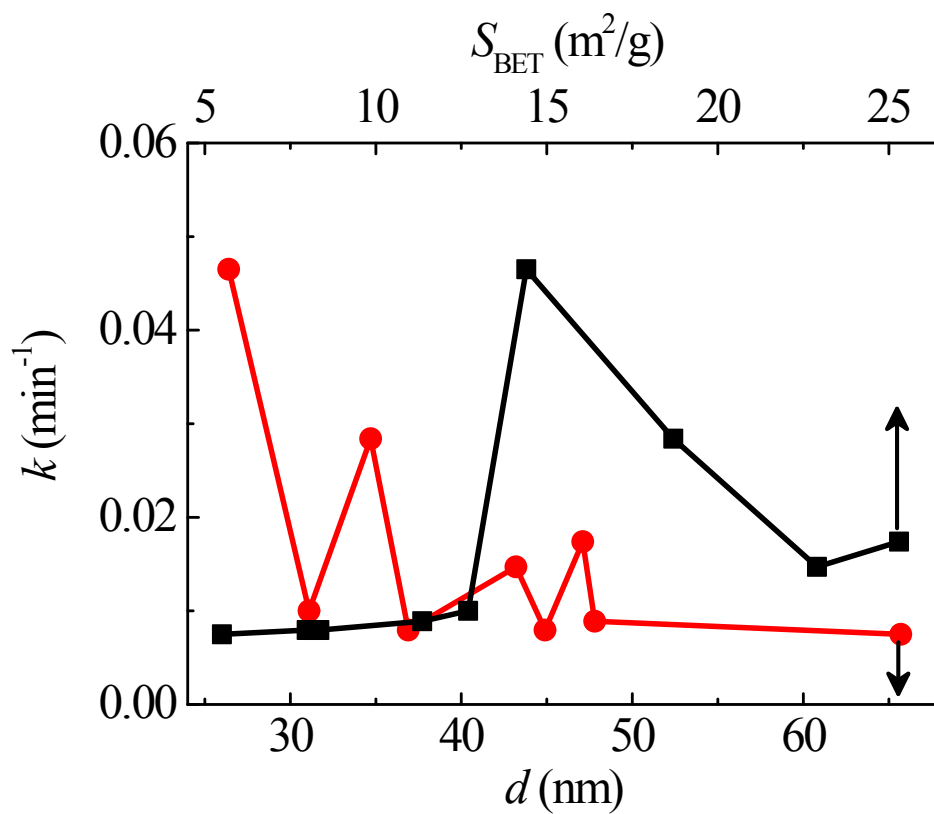

Fig. S7 Variation of rate constant ( $k$ ) with  $S_{\text{BET}}$  and nanosheet thickness ( $d$ ).

### Reference

- [1] D. Mitoraj, H. Kisch, *Angew. Chem., Int. Ed.*, 2008, **47**, 9975.
